1 **MoB (Measurement of Biodiversity): a method to separate the scale-dependent effects of**  
2 **species abundance distribution, density, and aggregation on diversity change**

3 Daniel McGlinn<sup>1\*†</sup>, Xiao Xiao<sup>2\*</sup>, Felix May<sup>3</sup>, Nicholas J. Gotelli<sup>4</sup>, Shane A. Blowes<sup>3</sup>, Tiffany  
4 Knight<sup>3,5,6</sup>, Oliver Purschke<sup>3</sup>, Jonathan Chase<sup>3,7+</sup>, Brian McGill<sup>2+</sup>

5 † corresponding author

6 \* joint first authors

7 + joint last authors

8 Author affiliations

9 1. Biology Department, College of Charleston, Charleston, SC, [mcglinndj@cofc.edu](mailto:mcglinndj@cofc.edu)

10 2. School of Biology and Ecology, and Senator George J. Mitchell Center of Sustainability  
11 Solutions, University of Maine, Orono, ME

12 3. German Centre for Integrative Biodiversity Research (iDiv), Halle-Jena-Leipzig, Deutscher  
13 Platz 5e, 04103 Leipzig, Germany

14 4. Department of Biology, University of Vermont, Burlington VT 05405 USA

15 5. Institute of Biology, Martin Luther University Halle-Wittenberg, Am Kirchtor 1, 06108, Halle  
16 (Saale), Germany

17 6. Dept. Community Ecology, Helmholtz Centre for Environmental Research – UFZ, Theodor-  
18 Lieser-Straße 4, 06120 Halle (Saale), Germany

19 7. Department of Computer Science, Martin Luther University, Halle-Wittenberg

20 **Authors' contributions**

21 DM, XX, JC, and BM conceived the study and the overall approach, and all authors participated  
22 in multiple working group meetings to develop and refine the approach; JC and TK collected the  
23 data for the empirical example that led to Figures 4-6; XX, DM, and FM, wrote the R package,

24 NG, JC, and BM provided guidance on method development, DM carried out the analysis of the  
25 empirical example, and XX carried out the sensitivity analysis; DM and XX wrote first draft of  
26 the manuscript, and all authors contributed substantially to revisions.

## 27 **Abstract**

- 28 1. Little consensus has emerged regarding how proximate and ultimate drivers such as  
29 abundance, productivity, disturbance, and temperature may affect species richness and other  
30 aspects of biodiversity. Part of the confusion is that most studies examine species richness at  
31 a single spatial scale and ignore how the underlying components of species richness can  
32 vary with spatial scale.
- 33 2. We provide an approach for the measurement of biodiversity (MoB) that decomposes scale-  
34 specific changes in richness into proximate components attributed to: 1) the species  
35 abundance distribution, 2) density of individuals, and 3) the spatial arrangement of  
36 individuals. We decompose species richness using a nested comparison of individual- and  
37 plot-based species rarefaction and accumulation curves.
- 38 3. Each curve provides some unique scale-specific information on the underlying components  
39 of species richness. We tested the validity of our method on simulated data, and we  
40 demonstrate it on empirical data on plant species richness in invaded and uninvaded  
41 woodlands. We integrated these methods into a new R package (`mobr`).
- 42 4. The metrics that `mobr` provides will allow ecologists to move beyond comparisons of  
43 species richness at a single spatial scale towards a more mechanistic understanding of the  
44 drivers of community organization that incorporates information on the scale dependence of  
45 the proximate components of species richness.

46 **Key words**

47 accumulation curve, community structure, extent, grain, rarefaction curve, species-area curve,  
48 species richness, spatial scale

49 **Introduction**

50 Species richness – the number of species co-occurring in a specified area – is one of the most  
51 widely-used biodiversity metrics. However, ecologists often struggle to understand the  
52 mechanistic drivers of richness, in part because multiple ecological processes can yield  
53 qualitatively similar effects on species richness (Chase and Leibold 2002, Leibold and Chase  
54 2017). For example, high species richness in a local community can be maintained either by  
55 species partitioning niche space to reduce interspecific competition (Tilman 1994), or by a  
56 balance between immigration and stochastic local extinction (Hubbell 2001). Similarly, high  
57 species richness in the tropics has been attributed to numerous mechanisms such as higher  
58 productivity supporting more individuals, higher speciation rates, and longer evolutionary time  
59 since disturbance (Rosenzweig 1995).

60         Although species richness is a single metric that can be measured at a particular grain  
61 size or spatial scale, it is a response variable that summarizes the underlying biodiversity  
62 information that is contained in the individual organisms, which each are assigned to a particular  
63 species, Operational Taxonomic Unit, or other taxonomic grouping. Variation in species richness  
64 can be decomposed into three components (He and Legendre 2002, McGill 2010): 1) the number  
65 and relative proportion of species in the regional source pool (i.e., the species abundance  
66 distribution, SAD), 2) the number of individuals per plot (i.e., density), and 3) the spatial  
67 distribution of individuals that belong to the same species (i.e., spatial aggregation). Changes in  
68 species richness may reflect one or a combination of all three components changing

69 simultaneously. In some cases, the density and spatial arrangement of individuals simply reflect  
70 sampling intensity and detection errors. But in other cases, density and spatial arrangement of  
71 individuals may reflect responses to experimental treatments that ultimately drive the patterns of  
72 observed species richness. Thus, it is critical that we look beyond richness as a single metric, and  
73 develop methods to disentangle its underlying components that have more mechanistic links to  
74 processes (e.g., Vellend 2016). Although this is not the only mathematically valid decomposition  
75 of species richness, these three components are well-studied properties of ecological systems,  
76 and provide insights into mechanisms behind changes in richness and community structure  
77 (Harte et al. 2008, Supp et al. 2012, McGlinn et al. 2015).

78         The shape of the regional SAD influences local richness. The shape of the SAD is  
79 influenced by the degree to which common species dominate the individuals observed in a  
80 region, and on the total number of highly rare species. Local communities that are part of a more  
81 even regional SAD (i.e., most species having similar abundances) will have high values of local  
82 richness because it is more likely that the individuals sampled will represent different species.  
83 Local communities that are part of regions with a more uneven SAD (e.g., most individuals are a  
84 single species) will have low values of local richness because it is more likely that the  
85 individuals sampled will be the same, highly common species (He and Legendre 2002, McGlinn  
86 and Palmer 2009). The richness of the regional species pool, which is influenced by the total  
87 number of rare species, has a similar effect on local richness. As regional species richness  
88 increases, local richness will also increase if the local community is even a partly random  
89 subsample of the species in the regional pool. Because the regional species pool is never fully  
90 observed, the two sub-components –the shape of the SAD and the size of the regional species

91 pool – cannot be completely disentangled. Thus, we group them together, as the SAD effect on  
92 local richness.

93         The number of individuals in the local community directly affects richness due to the  
94 sampling effect (the More Individuals Hypothesis of richness; Hurlbert 2004). As more  
95 individuals are randomly sampled from the regional pool, species richness is bound to increase.  
96 This effect has been hypothesized to be strongest at fine spatial scales; however, even at larger  
97 spatial scales, it never truly goes to zero (Palmer and van der Maarel 1995, Palmer et al. 2008).

98         The spatial arrangement of individuals within a plot or across plots is rarely random.  
99 Instead most individuals are spatially clustered or aggregated in some way, with neighboring  
100 individuals more likely belonging to the same species. As individuals within species become  
101 more spatially clustered, local diversity will decrease because the local community or sample is  
102 likely to consist of clusters of only a few species (Karlson et al. 2007, Chiarucci et al. 2009,  
103 Collins and Simberloff 2009).

104         Traditionally, individual-based rarefaction has been used to control for the effect of  
105 numbers of individuals on richness comparisons (Hurlbert 1971, Simberloff 1972, Gotelli and  
106 Colwell 2001), but few methods exist (e.g., Cayuela et al. 2015) for decomposing the effects of  
107 SADs and spatial aggregation on species richness. Because species richness depends intimately  
108 on the spatial and temporal scale of sampling, the relative contributions of the three components  
109 are also likely to change with scale. Spatial scale can be represented both by number of  
110 individuals, which scales linearly with area when density is relatively constant, and by the  
111 number of samples (plots). We will demonstrate that this generalized view of spatial scale allows  
112 us to distinguish three different types of sampling curves: (1) (spatially constrained) plot-based  
113 accumulation; (2) non-spatial plot-based rarefaction; and (3) (non spatial) individual-based

114 rarefaction. Constructing these different curves allows us to parse the relative contributions of  
115 the three proximate drivers of richness and how those contributions potentially change with  
116 spatial scale. Specifically, we develop a framework that provides a series of sequential analyses  
117 for estimating and testing the effects of the SAD, individual density, and spatial aggregation on  
118 changes in species richness across scales. We have implemented these methods in a freely  
119 available R package `mobr` (<https://github.com/MoBiodiv/mobr>)

## 120 **Materials and Methods**

### 121 *Method Overview*

122 Our method targets data collected in standardized sampling units such as quadrats, plots,  
123 transects, net sweeps, or pit falls of constant area or sampling effort (we refer to these as “plots”)  
124 that are assigned to treatments. We use the term treatment here generically to refer to  
125 manipulative treatments or to groups within an observational study (e.g., invaded vs uninvaded  
126 plots). The designation of plots within treatments implicitly defines the  $\alpha$  scale – a single plot –  
127 and the  $\gamma$  scale – all plots within a treatment. If the sampling design is relatively balanced among  
128 treatments, the total sample area and the spatial extent (the minimum polygon encompassing all  
129 the plots in the treatment) are similar for each treatment. In an experimental study, each plot is  
130 assigned to a treatment. In an observational study, each plot is assigned to a categorical grouping  
131 variable(s). For this typical experimental/sampling design, our method provides two key outputs:  
132 1) the relative contribution of the different components affecting richness (SAD, density, and  
133 spatial aggregation) to the observed change in richness between treatments and 2) quantifying  
134 how species richness and its decomposition change with spatial scale. We propose two  
135 complementary ways to view scale-dependent shifts in species richness and its components: a  
136 simple-to-interpret two-scale analysis and a more informative continuous scale analysis.

137 The two-scale analysis provides a big-picture view of the changes between the treatments  
 138 by focusing exclusively on the  $\alpha$  (plot-level) and  $\gamma$  (across all plots) spatial scales. It provides  
 139 diagnostics for whether species richness and its components differ between treatments at the two  
 140 scales. The continuous scale analysis expands the two-scale analysis by taking advantage of three  
 141 distinct species richness curves computed across a range of scales: 1) plot-based accumulation  
 142 curve (Gotelli and Colwell 2001, Chiarucci et al. 2009), where the order in which plots are  
 143 sampled depends on their spatial proximity; 2) the non-spatial, plot-based rarefaction, where  
 144 individuals are randomly shuffled across plots within a treatment while maintaining average plot  
 145 density; and 3) the individual-based rarefaction curve where again individuals are randomly  
 146 shuffled across plots within a treatment but in this case average plot density is not maintained.  
 147 The differences between these curves are used to isolate the effects of the SAD, density of  
 148 individuals, and spatial aggregation on richness and document how these effects change as a  
 149 function of scale.

### 150 *Detailed Data Requirements*

151 Table 1. Mathematical nomenclature used in the study.

| Treatment<br>(or group<br>label) | Plot     | Coordinates         | Species 1   | ...      | Species $S$ | Total abundance              | Richness  |
|----------------------------------|----------|---------------------|-------------|----------|-------------|------------------------------|-----------|
| 1                                | 1        | $x_{1,1}$ $y_{1,1}$ | $n_{1,1,1}$ | ...      | $n_{1,1,S}$ | $N_{1,1} = \sum_s n_{1,1,s}$ | $S_{1,1}$ |
| $\vdots$                         | $\vdots$ | $\vdots$ $\vdots$   | $\vdots$    | $\vdots$ | $\vdots$    | $\vdots$                     | $\vdots$  |
| 1                                | $K$      | $x_{1,K}$ $y_{1,K}$ | $n_{1,K,1}$ | $\vdots$ | $n_{1,K,S}$ | $N_{1,K} = \sum_s n_{1,K,s}$ | $S_{1,K}$ |
| 2                                | 1        | $x_{2,1}$ $y_{2,1}$ | $n_{2,1,1}$ | $\vdots$ | $n_{2,1,S}$ | $N_{2,1} = \sum_s n_{2,1,s}$ | $S_{2,1}$ |
| $\vdots$                         | $\vdots$ | $\vdots$ $\vdots$   | $\vdots$    | $\vdots$ | $\vdots$    | $\vdots$                     | $\vdots$  |
| 2                                | $K$      | $x_{2,K}$ $y_{2,K}$ | $n_{2,K,1}$ | ...      | $n_{2,K,S}$ | $N_{2,K} = \sum_s n_{2,K,s}$ | $S_{2,K}$ |

152

153 Consider  $T = 2$  treatments, with  $K$  replicated plots per treatment (Table 1). Within each  
154 plot, we have measured the abundance of each species, which can be denoted by  $n_{t,k,s}$ , where  $t =$   
155 1, 2 for treatment,  $k = 1, 2, \dots K$  for plot number within the treatment, and  $s = 1, 2, \dots S$  for  
156 species identity, with a total of  $S$  species recorded among all plots and treatments. The  
157 experimental design does not necessarily have to be balanced (i.e.,  $K$  can differ between  
158 treatments) if the spatial extent is still similar between the treatments. For simplicity of notation  
159 we describe the case of a balanced design here.  $S_{t,k}$  is the number of species observed in plot  $k$  in  
160 treatment  $t$  (i.e., number of species with  $n_{t,k,s} > 0$ ), and  $N_{t,k}$  is the number of individuals observed  
161 in plot  $k$  in treatment  $t$  (i.e.,  $N_{t,k} = \sum_S n_{t,k,s}$ ). The spatial coordinates of each plot  $k$  in treatment  $t$   
162 are  $x_{t,k}$  and  $y_{t,k}$ . We focus on spatial patterns but our framework also applies analogously to  
163 samples distributed through time.

164 For clarity of explanation we focus here on a single-factor design with two (or more)  
165 categorical treatment levels. The method can be extended to accommodate crossed designs and  
166 regression-style continuous treatments which we describe in the Discussion and Supplement S5.

### 167 *Two-scale analysis*

168 The two-scale analysis is intended to provide a simple decomposition of species richness  
169 while still emphasizing the three components and change with spatial scale. In the two-scale  
170 analysis, we compare observed species richness in each treatment and several other summary  
171 statistics at the  $\alpha$  and  $\gamma$  scales (Table 2). The summary statistics were chosen to represent the  
172 most informative aspects of individual-based rarefaction curves (Fig. 1). These rarefaction  
173 curves plot the expected species richness  $S_n$  against the number of individuals when individuals  
174 are randomly drawn from the sample at the  $\alpha$  or  $\gamma$  scales. The curve can be calculated precisely



175 using the hypergeometric sampling formula given the SAD ( $n_{t,k,s}$  at the plot level,  $n_{t,+s}$  at the  
176 treatment level) (Hurlbert 1971).

177 We show how several widely-used diversity metrics are represented along the individual  
178 rarefaction curve, corresponding to  $\alpha$  and  $\gamma$  scales (Fig. 1, Table 2, see Supplement S1 for  
179 detailed metric description). The total number of individuals within a plot ( $N_{t,k}$ ) or within a  
180 treatment ( $N_{t,+}$ ) determines the endpoint of the rarefaction curves. Rarefied richness ( $S_n$ ) controls  
181 richness comparisons for differences in individual density between treatments because it is the  
182 expected number of species for a random draw of  $n$  individuals ranging from 1 to  $N$ . To compute  
183  $S_n$  at the  $\alpha$  scale we set  $n$  to the minimum number of individuals across all samples in both  
184 treatments with a hard minimum of 5, and at the  $\gamma$  scale we multiplied this  $n$  value by the number  
185 of samples within a treatment (i.e.,  $K$ ). The probability of intraspecific encounter (PIE),  $S_{\text{asymptote}}$   
186 (via Chao1 estimator) and the number of undiscovered species ( $f_0$ ) reflect the SAD component.  
187 We follow Jost (2007) and convert PIE into effective numbers of species ( $S_{\text{PIE}}$ ) so that it can be  
188 more easily interpreted as a metric of diversity (See Supplement S1 for more description and  
189 justification of PIE,  $f_0$ , and associated  $\beta$  metrics). Whittaker's multiplicative beta diversity  
190 metrics for  $S$ ,  $S_{\text{PIE}}$ , and  $f_0$  reflect the degree of turnover between the  $\alpha$  and  $\gamma$  scales. In Fig. 1,  
191 species are spatially aggregated across plots, and  $\beta_S$  is large.

192

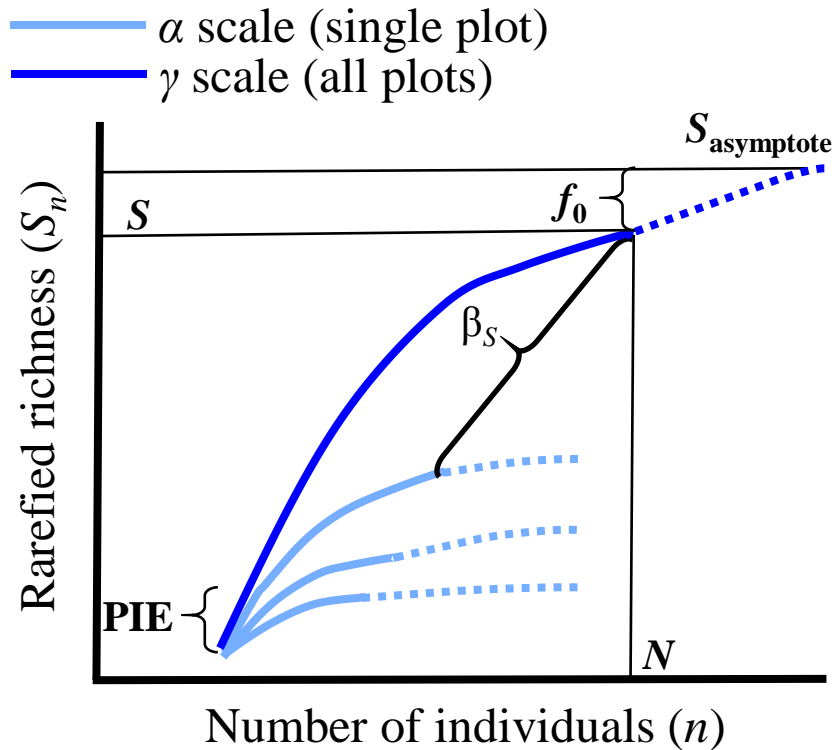

193

194 Figure 1. Illustration of how the key biodiversity metrics are derived from the individual-based  
 195 rarefaction curves constructed at the  $\alpha$  (i.e., single plot) and  $\gamma$  (i.e., all plots) scales. The solid  
 196 lines are rarefied richness derived from the randomly sampling individuals from each plot's SAD  
 197 and the dotted lines reflect the extrapolated richness via Chao1 estimator. The light blue curves  
 198 show individual rarefaction curves for each plot. The labeled metrics can also be calculated for  
 199 each  $\alpha$ -scale curve (not shown). The dark blue curve reflects the individual rarefaction curve at  
 200 the  $\gamma$ -scale, with all individuals from all plots combined.  $S$  and  $N$  correspond to the ending points  
 201 of the rarefaction curve on the richness and individual axes, respectively.  $S_{\text{asymptote}}$  is the  
 202 extrapolated asymptote. See Table 2 for definitions of metrics including ones not illustrated.

203

204

205

Comparison of these summary statistics between treatments identifies whether the  
 treatments have a significant effect on richness at these two scales, and if they do, the potential  
 proximate driver(s) of the change. A difference in  $N$  between treatments implies that differences

206 in richness between treatments may be a result of treatments changing the density of individuals.  
207 Differences in  $S_{\text{PIE}}$  and/or  $f_0$  imply that change in the shape of the SAD may contribute to the  
208 change in richness, with  $S_{\text{PIE}}$  being most sensitive to changes in abundant species and  $f_0$  being  
209 most sensitive to changes in number of rare species. Differences in  $\beta$ -diversity metrics may be  
210 due to differences in any of the three components: SAD, N, or aggregation, and each  $\beta$  metric  
211 (Table 2) provides a different weighting on common vs rare species.  
212

213 Table 2. Definitions and interpretations of the summary statistics for simplified two-scale  
 214 analysis

| Metric            | Definition                                                                                                       | Interpretation                                                                                                                              |
|-------------------|------------------------------------------------------------------------------------------------------------------|---------------------------------------------------------------------------------------------------------------------------------------------|
| $S$               | Observed richness, effective number of species of order 0 (Jost, 2007)                                           | Number of species                                                                                                                           |
| $N$               | Total abundance across all species                                                                               | Measure of density of individuals                                                                                                           |
| $S_n$             | The expected richness for $n$ randomly sampled individuals (Hurlbert 1971).                                      | Estimate of richness after controlling for differences due to aggregation or number of individuals (i.e., only reflects SAD)                |
| PIE               | Probability of intraspecific encounter ( $S_{n=2} - S_{n=1}$ , Hurlbert 1971, Olszewski 2004),                   | Measure of evenness, slope at base of the rarefaction curve, and sensitive to common species                                                |
| $S_{PIE}$         | Number of equally abundant species needed to yield PIE (i.e., effective number of species of order 2, Jost 2007) | Effective number of species of PIE that is easier to compare with $S$ ( $= 1 / (1 - PIE)$ )                                                 |
| $S_{asymptote}$   | Extrapolated asymptotic richness via Chao1 estimator (Chao 1984).                                                | Richness that includes unknown species but is highly correlated with $S$ (McGill 2011)                                                      |
| $f_0$             | Richness of undetected species ( $S_{asymptote} - S$ , Chao et al. 2009).                                        | Measure of rarity at top of rarefaction curve, more sensitive to rare species than $S$                                                      |
| $\beta_S$         | Ratio of total treatment $S$ and average plot $S$ (Whittaker 1960)                                               | More species turnover results in larger $\beta_S$ which may be due to increases in spatial aggregation, $N$ , and/or unevenness of the SAD. |
| $\beta_{f_0}$     | Ratio of total treatment $f_0$ and average plot $f_0$                                                            | Like $\beta_S$ but emphasizes rare species                                                                                                  |
| $\beta_{S_{PIE}}$ | Ratio of total treatment and average plot $S_{PIE}$ (Olszewski 2004)                                             | Like $\beta_S$ but emphasizes common species                                                                                                |

215  
 216 The treatment effect on these metrics can be visually examined with boxplots (see  
 217 Empirical example section) at the  $\alpha$  scale and with single points at the pooled  $\gamma$ -scale (unless  
 218 there is replication at the  $\gamma$  scale as well). Quantitative comparison of the metrics can be made

219 with t-tests (ANOVAs for more than two treatments) or, for highly skewed data, nonparametric  
220 tests such as Mann-Whitney U test (Kruskal-Wallis for more than two treatments).

221 We provide a non-parametric, randomization test where the null expectation of each  
222 metric is established by randomly shuffling the plots between the treatments, and recalculating  
223 the metrics for each reshuffle. The significance of the differences between treatments can then be  
224 evaluated by comparing the observed test statistic to the null expectation when the treatment IDs  
225 are randomly shuffled across the plots (Legendre and Legendre 1998). When more than two  
226 groups are compared the test examines the overall group effect rather than specific group  
227 differences. At the  $\alpha$  scale where there are replicate plots to summarize over, we use the  
228 ANOVA  $F$ -statistic as our test statistic (Legendre and Legendre 1998), and at the  $\gamma$  scale in  
229 which we only have a single value for each treatment (and therefore cannot use the  $F$ -statistic)  
230 the test statistic is the absolute difference between the treatments (if more than two treatments  
231 are considered then it is the average of the absolute differences,  $\bar{D}$ ). At both scales we use  $\bar{D}$  as a  
232 measure of effect size.

233 Note that  $N_{t,k}$  and  $N_{t,+}$  give the same information, because one scales linearly with the  
234 other by a constant (i.e.,  $N_{t,+}$  is equal to  $N_{t,k}$  multiplied by the number of plots  $K$  within  
235 treatment). However, the other metrics ( $S$ ,  $f_0$  and  $S_{PIE}$ ) are not directly additive across scales.  
236 Evaluation of these metrics at different scales may yield different insights for the treatments,  
237 sometimes even in opposite directions (Chase et al. *submitted*). However, complex scale-  
238 dependence may require comparison of entire sampling curves (rather than their two-scale  
239 summary statistics) to understand how differences in community structure change continuously  
240 across a range of spatial scales.

241 *Continuous scale analysis*

242 While the two-scale analysis provides a useful tool with familiar methods, it ignores the role of  
243 scale as a continuum. Such a discrete scale perspective can only provide a limited view of  
244 treatment differences at different scales. We develop in this section a method to examine the  
245 components of change across a continuum of spatial scale. We define spatial scale by the amount  
246 of sampling effort, which we define as the number of individuals or the number of plots sampled.  
247 Assuming that the density of individuals is constant across plots, these measures should be  
248 proportional to each other.

249 The three curves

250 The key innovation is to use three distinct types of species accumulation and rarefaction curves  
251 that capture different components of community structure. By a carefully sequenced analysis, it  
252 is possible to tease apart the effects of SAD shape, of changes in density of individuals ( $N$ ), and  
253 of spatial aggregation across a continuum of spatial scale. The three types of curves are  
254 summarized in Table 3. Fig. 2 shows graphically how they are constructed.

255 The first curve, is the spatial plot-based or sample-based accumulation curve (Gotelli and  
256 Colwell 2001 or spatially-constrained rarefaction Chiarucci *et al.* 2009). It is constructed by  
257 accumulating plots within a treatment based on their spatial position such that the most  
258 proximate plots are collected first. One can think of this as starting with a target plot and then  
259 expanding a circle centered on the target plot until one additional plot is added, then expanding  
260 the circle until another plot is added, etc. In practice, every plot is used as the starting target plot  
261 and the resulting curves are averaged to give a smoother curve. If two or more plots are of equal  
262 distance to the target plot, they are accumulated in random order.

263 The second curve is the non-spatial, plot-based rarefaction curve (Supplement S2). It is

264 constructed by randomly sampling plots within a treatment in which the individuals in the plots  
265 have first been randomly shuffled among the plots within a treatment, while maintaining the  
266 plot-level average abundance ( $\overline{N_{t,k}}$ ) and the treatment-level SAD ( $\vec{n}_{t,+} = \sum_k \vec{n}_{t,k}$ ). Note that this  
267 rarefaction curve is very different from the traditional “sample-based rarefaction curve” (Gotelli  
268 and Colwell 2001), in which plots are randomly shuffled to build the curve but individuals within  
269 a plot are preserved (and consequently any within-plot spatial aggregation is retained). Our non-  
270 spatial, plot-based rarefaction curve contains the same information (plot density and SAD) as the  
271 spatial accumulation curve, but it has nullified any signal due to species spatial aggregation both  
272 within and between plots.

273 The third curve is the familiar individual-based species rarefaction curve. It is constructed  
274 by first pooling individuals across all plots within a treatment, and then randomly sampling  
275 individuals without replacement. This individual-based rarefaction curve reflects only the shape  
276 of the underlying SAD ( $\vec{n}_{t,+}$ ).

277 It can be computationally intensive to compute rarefaction curves, and therefore  
278 analytical formulations of these curves are desirable to speed up software. It is unlikely an  
279 analytical formulation of the plot-based accumulation curve exists because it requires averaging  
280 over each possible ordering of nearest sites; however, analytical expectations are available for  
281 the sample- and individual-based rarefaction curves. Specifically, we used the hypergeometric  
282 formulation provided by Hurlbert (1971) to estimate expected richness of the individual-based  
283 rarefaction curve. To estimate the plot-based rarefaction curve we extended Hurlbert’s (1971)  
284 formulation (see Supplement S2). Our derivation demonstrates that the non-spatial curve is a  
285 rescaling of the individual-based rarefaction curve based upon the degree of difference in density  
286 between the two treatments under consideration. Specifically, we use the ratio of average

287 community density to the density in the treatment of interest to rescale sampling effort in the  
288 individual based rarefaction curve. For a balanced design, the individual rarefaction curve of  
289 Treatment 1 can be adjusted for density effects by multiplying the sampling effort of interest by:  
290  $(\sum_t \sum_k N_{t,k}) / (2 \cdot \sum_k N_{1,k})$ . Similarly, the Treatment 2 curve would be rescaled by  
291  $(\sum_t \sum_k N_{t,k}) / (2 \cdot \sum_k N_{2,k})$ . If the treatment of interest has the same density as the average  
292 community density then there is no density effect, and the plot-based curve is equivalent to the  
293 individual-based rarefaction curve. Here we have based the density rescaling on average number  
294 of individuals, but alternatives exist such as using maximum or minimum treatment density.  
295 Note that the plot-based curve is only relevant in a treatment comparison, which contrasts with  
296 the other two rarefaction curves that can be constructed independently of any consideration of  
297 treatment effects.  
298



299 Table 3. Summary of three types of species sampling curves. For treatment  $t$ ,  $\vec{n}_{t,+}$  is the vector  
 300 of species abundances,  $\vec{n}_t$  is the vector of plot abundances, and  $\vec{d}_t$  is the vector of distances  
 301 between plots.

| Curve Name                               | Notation                                          | Method for accumulation                                                                                                                                                                                                                                                                                                                                                                                                                                                                                                                      | Interpretation                                                                                                                                                                                                              |
|------------------------------------------|---------------------------------------------------|----------------------------------------------------------------------------------------------------------------------------------------------------------------------------------------------------------------------------------------------------------------------------------------------------------------------------------------------------------------------------------------------------------------------------------------------------------------------------------------------------------------------------------------------|-----------------------------------------------------------------------------------------------------------------------------------------------------------------------------------------------------------------------------|
| Spatial plot-based accumulation curve    | $E[S_t   k, \vec{n}_{t,+}, \vec{N}_t, \vec{d}_t]$ | Spatially explicit sampling in which the most proximate plots to a focal plot are accumulated first. All possible focal plots are considered and the resulting curves are averaged over.                                                                                                                                                                                                                                                                                                                                                     | This curve includes all information in the data including effect of SAD, effect of density of individuals, and effect of spatial aggregation.                                                                               |
| Nonspatial, plot-based rarefaction curve | $E[S_t   k, \vec{n}_{t,+}, \vec{N}_t]$            | Random sampling of $k$ plots after removing intraspecific spatial aggregation by randomly shuffling individuals across plots while maintaining average plot-level abundance ( $\overline{N}_{t,k}$ ) and the treatment-level SAD ( $n_{t,+s} = \sum_k n_{t,k,s}$ ). In practice, we use an analytical extension of the hypergeometric distribution that demonstrates this curve is a rescaling of the individual-base rarefaction curve based on the ratio: (average density across treatments) / (average density of treatment of interest) | This curve reflects both the shape of the SAD and the difference in density between the treatments. If density between the two treatments is identical then this curve converges on the individual-based rarefaction curve. |
| Individual-based rarefaction curve       | $E[S_t   N, \vec{n}_{t,+}]$                       | Random sampling of $N$ individuals from the observed SAD ( $\vec{n}_{t,+}$ ) without replacement.                                                                                                                                                                                                                                                                                                                                                                                                                                            | By randomly shuffling individuals with no reference to plot density, all spatial and density effects are removed. Only the effect of the SAD remains.                                                                       |

## a) Spatial, plot-based accumulation

Accumulate plots by nearest neighbors

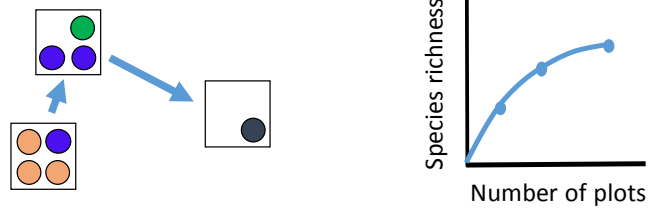

## b) Non-spatial, plot-based rarefaction

Shuffle individuals between plots retaining density, then accumulate plots randomly (breaking spatial structure)

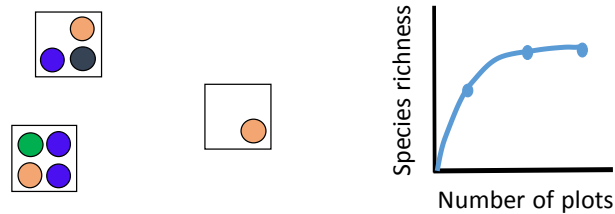

## c) Individual-based rarefaction

Pool individuals across plots within a treatment, then accumulate individuals randomly (breaking density and spatial effects)

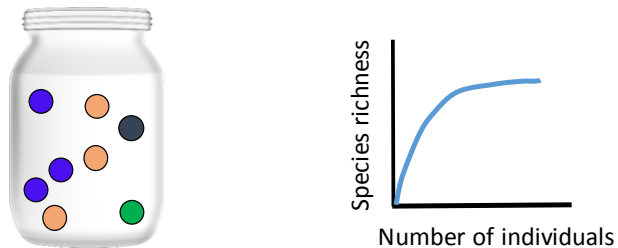

302

303 Figure 2. Illustration of how the three sampling curves are constructed. Circles of different colors

304 represent individuals of different species. See Table 3 for detailed description of each sampling

305 curve.

306 The mechanics of isolating the distinct effects of spatial aggregation, density, and SAD

307 The three curves capture different components of community structure that influence

308 richness changes across scales (measured in number of samples or number of individuals, both of

309 which can be easily converted to area, Table 3). Therefore, if we assume the components  
310 contribute additively to richness, then the effect of a treatment on richness propagated through a  
311 single component at any scale can be obtained by subtracting the rarefaction curves from each  
312 other. For simplicity and tractability, we assume additivity to capture first-order effects. This  
313 assumption is supported by Tjørve *et al.*'s (2008) demonstration that an additive partitioning of  
314 richness using rarefaction curves reveals random sampling and aggregation effects when using  
315 presence-absence data. We further validated this assumption using sensitivity analysis (see  
316 "Sensitivity analysis of the method" and Table 5). Below we describe the algorithm to obtain the  
317 distinct effect of each component. Figure 3 provides a graphic illustration.

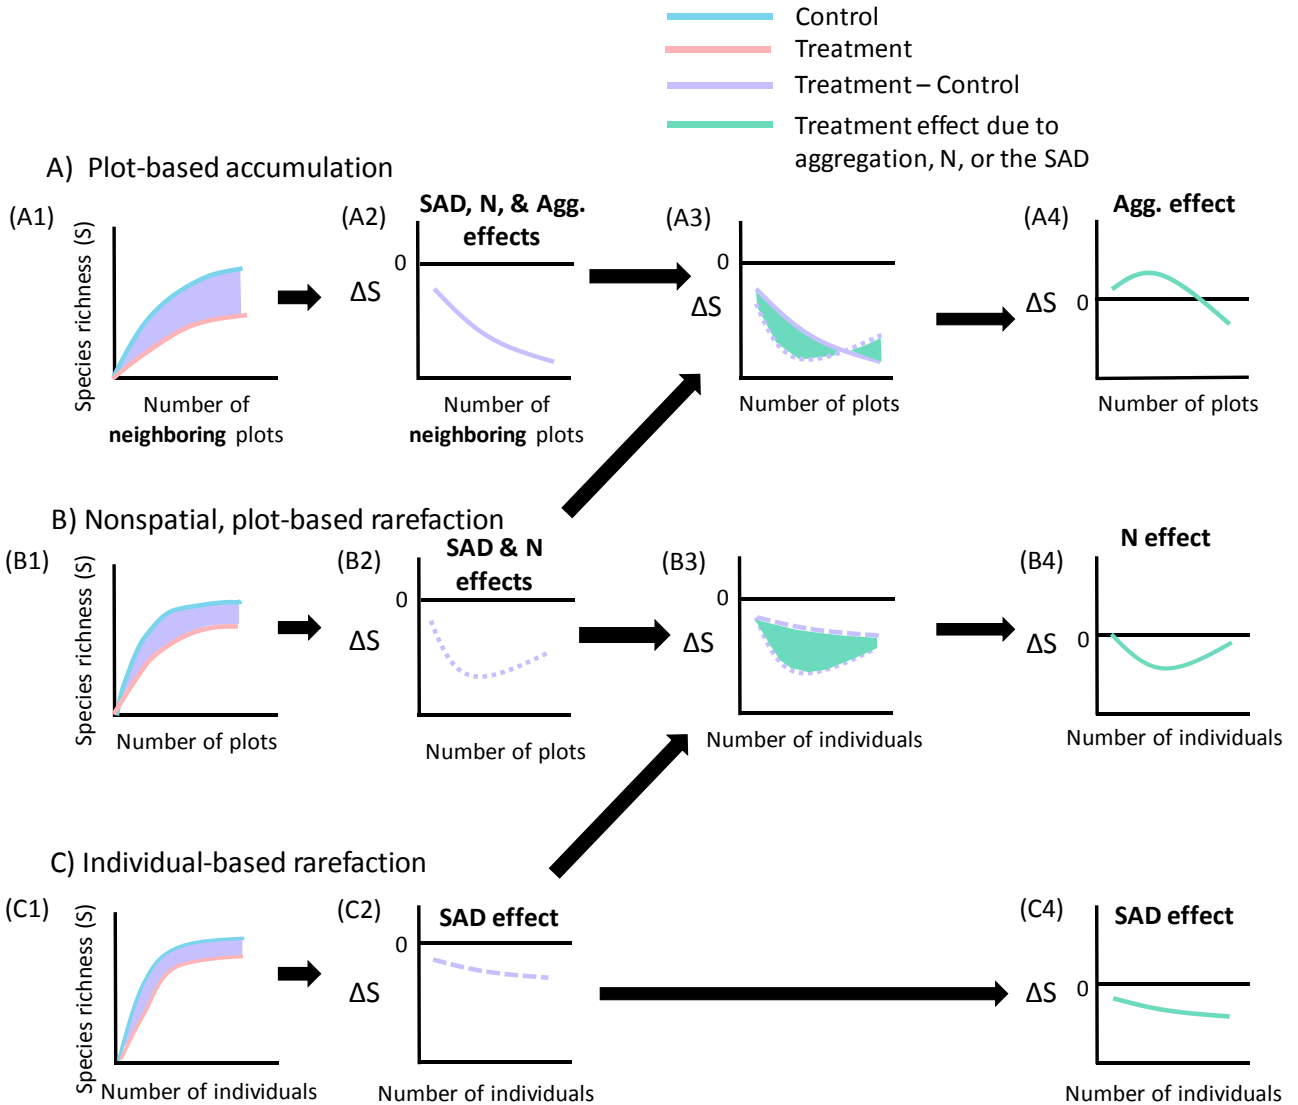

318

319 Figure 3. Steps separating the distinct effect of the three factors on richness. The experimental

320 design has two treatments (blue and orange curves). The purple shaded area on the left and the

321 equivalent purple curve in each plot to the right represent the difference in richness (i.e.,

322 treatment effect) for each set of curves. By taking the difference again (green shaded area and

323 curves) we can obtain the treatment effect on richness through a single component. See text for

324 details (Eqn 1.). The three types of curves are defined in Fig. 2 and Table 3.

325

326 *i) Effect of aggregation*

327 The difference between the plot-based accumulation curves of two treatments,

328  $\Delta(S_{21}|k, \vec{n}_{t,+}, \vec{N}_t, \vec{d}_t) = E[S_2|k, \vec{n}_{2,+}, \vec{N}_2, \vec{d}_2] - E[S_1|k, \vec{n}_{1,+}, \vec{N}_1, \vec{d}_1]$ , gives the observed

329 difference in richness between treatments across scales (Fig. 3A2, solid purple curve). It

330 encapsulates the treatment effect propagated through all three components: shape of the SAD,

331 density of individuals, and spatial aggregation. Differences between treatments in any of these

332 factors could potentially translate into observed difference in species richness.

333 Similarly, the difference between the non-spatial, plot-based rarefaction

334 curves,  $\Delta(S_{21}|k, \vec{n}_{t,+}, \vec{N}_t) = E[S_2|k, \vec{n}_{2,+}, \vec{N}_2] - E[S_1|k, \vec{n}_{1,+}, \vec{N}_1]$ , gives the expected difference

335 in richness across treatments when spatial aggregation is removed (Fig. 3B2, purple dotted

336 curve). The distinct effect of aggregation across treatments from one plot to  $k$  plots can thus be

337 obtained by taking the difference between the two  $\Delta S$  values (Fig. 3A3, green shaded area), i.e.,

338 
$$\Delta(S_{21}|\text{aggregation}) = \Delta(S_{21}|k, \vec{n}_{t,+}, \vec{N}_t, \vec{d}_t) - \Delta(S_{21}|k, \vec{n}_{t,+}, \vec{N}_t)$$

339 
$$= (E[S_2|k, \vec{n}_{2,+}, \vec{N}_2, \vec{d}_2] - E[S_1|k, \vec{n}_{1,+}, \vec{N}_1, \vec{d}_1]) - (E[S_2|k, \vec{n}_{2,+}, \vec{N}_2] - E[S_1|k, \vec{n}_{1,+}, \vec{N}_1])$$
 (Eqn 1)

340 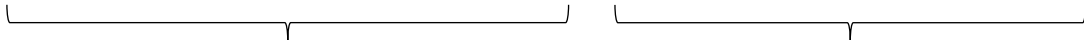

341 effect of aggregation, density, and SAD

effect of density and SAD

342 Equation 1 demonstrates that the effect of aggregation can be thought of as the difference

343 between treatment effects quantified by the plot-based accumulation and plot-based rarefaction

344 curves. An algebraic rearrangement of Eqn 1 demonstrates that  $\Delta(S_{21}|\text{aggregation})$  can also be

345 thought of as the difference between the treatments of the same type of rarefaction curve:

346 
$$= (E[S_2|k, \vec{n}_{2,+}, \vec{N}_2, \vec{d}_2] - E[S_2|k, \vec{n}_{2,+}, \vec{N}_2]) - (E[S_1|k, \vec{n}_{1,+}, \vec{N}_1, \vec{d}_1] - E[S_1|k, \vec{n}_{1,+}, \vec{N}_1])$$
 (Eqn 2)

347 

348 effect of aggregation in Treatment 2

effect of aggregation in Treatment 1

349 This simple duality can be extended to the estimation of the density and SAD effects, but we will  
350 only consider the approach laid out in Eqn 1 below. In Fig. 3, we separate each individual effect  
351 using the approach of Eqn 1 while the code in the `mobr` package uses the approach of Eqn 2.

352 One thing to note is that the effect of aggregation always converges to zero at the  
353 maximal spatial scale ( $k = K$  plots) for a balanced design. This is because, when all plots have  
354 been accumulated,  $\Delta(S_{21}|k, \vec{n}_{t,+}, \vec{N}_t, \vec{d}_t)$  and  $\Delta(S_{21}|k, \vec{n}_{t,+}, \vec{N}_t)$  will both converge on the  
355 difference in total richness between the treatments. However, for an unbalanced design in which  
356 one treatment has more plots than the other,  $\Delta(S_{21}|aggregation)$  would converge to a nonzero  
357 constant because  $E[S_t|k, \vec{n}_{t,+}, \vec{N}_t, \vec{d}_t] - E[S_t|k, \vec{n}_{t,+}, \vec{N}_t]$  would be zero for one treatment but not  
358 the other at the maximal spatial scale (i.e.,  $\min(K_1, K_2)$  plots). This artefact is inevitable and  
359 should not be interpreted as a real decline in the relative importance of aggregation on richness,  
360 but as our diminishing ability to detect such effect without sampling a larger region.

361 *ii) Effect of density:*

362 In the same vein, the difference between the individual-based rarefaction curves of the two  
363 treatments,  $\Delta(S_{21}|N, \vec{n}_{t,+}) = E[S_2|N, \vec{n}_{2,+}] - E[S_1|N, \vec{n}_{1,+}]$ , yields the treatment effect on  
364 richness propagated through the shape of the SAD alone, with the other two components  
365 removed (Fig. 3C2, purple dashed curve). The distinct effect of density across treatments from  
366 one individual to  $N$  individuals can thus be obtained by subtracting the  $\Delta S$  value propagated  
367 through the shape of the SAD alone from the  $\Delta S$  value propagated through the compound effect  
368 of the SAD and density (Fig. 3B3, green shaded area), i.e.,

369

370 
$$\Delta(S_{21}|\text{density}) = \Delta(S_{21}|N, \vec{n}_{t,+}, \vec{N}_t) - \Delta(S_{21}|N, \vec{n}_{t,+})$$

371

372 
$$= \underbrace{(E[S_2|N, \vec{n}_{2,+}, \vec{N}_2] - E[S_1|N, \vec{n}_{1,+}, \vec{N}_1])}_{\text{effect of density and SAD}} - \underbrace{(E[S_2|N, \vec{n}_{2,+}] - E[S_1|N, \vec{n}_{1,+}])}_{\text{effect of SAD}} \quad (\text{Eqn 3})$$

373

374

375

376 Note that in Eqn 3, spatial scale is defined with respect to numbers of individuals sampled ( $N$ )  
 377 (and thus the grain size that would be needed to achieve this) rather than the number of samples  
 378 ( $k$ ).

379 *iii) Effect of SAD:*

380 The distinct effect of the shape of the SAD on richness between the two treatments is simply the  
 381 difference between the two individual-based rarefaction curves (Fig. 3B, purple dashed curve),  
 382 i.e.,

383 
$$\Delta(S_{21}|\text{SAD}) = \Delta(S_2|p, \vec{n}_{2,+}) - \Delta(S_1|p, \vec{n}_{1,+}) \quad (\text{Eqn 4})$$

384 The scale of  $\Delta(S_{21}|\text{SAD})$  ranges from one individual, where both individual rarefaction curves  
 385 have one species and thus  $\Delta(S_{21}|\text{SAD}) = 0$ , to  $N_{\min} = \min(N_{1,+}, N_{2,+})$ , which is the lower total  
 386 abundance between the treatments.

387 The formulae used to identify the distinct effect of the three factors are summarized in Table 4.

388

389 Table 4. Calculation of effect size curves.

| Factor      | Formula                                                                                                                                      | Note                                                                                                                                                                 |
|-------------|----------------------------------------------------------------------------------------------------------------------------------------------|----------------------------------------------------------------------------------------------------------------------------------------------------------------------|
| Aggregation | $\Delta(S_{21} \text{aggregation})$ $= \Delta(S_{21} k, \bar{n}_{t,+}, \bar{N}_t, \vec{d}_t)$ $- \Delta(S_{21} k, \bar{n}_{t,+}, \bar{N}_t)$ | Artificially, this effect always converges to zero at the maximal spatial scale ( $K$ plots) for a balanced design, or a non-zero constant for an unbalanced design. |
| Density     | $\Delta(S_{21} \text{density})$ $= \Delta(S_{21} N, \bar{n}_{t,+}, \bar{N}_t)$ $- \Delta(S_{21} N, \bar{n}_{t,+})$                           | To compute this quantity, the x-axes of the plot-based rarefaction curves are converted from plots to individuals using average individual density                   |
| SAD         | $\Delta(S_{21} \text{SAD})$ $= \Delta(S_2 N, \bar{n}_{2,+})$ $- \Delta(S_1 N, \bar{n}_{1,+})$                                                | This is estimated directly by comparing the individual rarefaction curves between two treatments.                                                                    |

390

391 Significance tests and acceptance intervals

392 In the continuous-scale analysis, we also applied Monte Carlo permutation procedures to 1)  
393 construct acceptance intervals (or non-rejection intervals) across scales on simulated null  
394 changes in richness, and 2) carry out goodness of fit tests on each component (Loosmore and  
395 Ford 2006, Diggle-Cressie-Loosmore-Ford test [DCLF]; Baddeley et al. 2014). See Supplement  
396 S3 for descriptions of how each set of randomizations was developed to generate 95%  
397 acceptance intervals ( $\Delta S_{\text{null}}$ ) which can be compared to the observed changes ( $\Delta S_{\text{obs}}$ ). Strict  
398 interpretations of significance in relation to the acceptance intervals is not warranted because  
399 each point along the spatial scale (x-axis) is effectively a separate comparison. Consequently, a  
400 problem arises with multiple non-independent tests and the 95% bands cannot be used for formal  
401 significance testing due to Type I errors. The DCLF test (see Supplement S3) provides an overall  
402 significance test with a proper Type I error rate (Loosmore and Ford, 2006) but this test in turn



403 suffers from Type II error (Baddeley et al. 2014). There is no mathematical resolution to this  
404 and user judgement should be emphasized if formal  $p$ -tests are needed.

#### 405 Sensitivity Analysis

406 Although the logic justifying the examination separating the effect of the three components is  
407 rigorous, we tested the validity of our approach (and the significance tests) by simulations using  
408 the R package `mobsim` (May et al. preprint, May 2017). The goal is to establish the rate of type I  
409 error (i.e., detecting significant treatment effect through a component when it does not differ  
410 between treatments) and type II error (i.e., nonsignificant treatment effect through a component  
411 when it does differ). This was achieved by systematically comparing simulated communities in  
412 which we altered one or more components while keeping the others unchanged (see Supplement  
413 S4). Overall, the benchmark performance of our method was good. When a factor did not differ  
414 between treatments, the detection of significant difference was low (Supplemental Table S4.1).  
415 Conversely, when a factor did differ, the detection of significant difference was high, but  
416 decreased at smaller effect sizes. Thus, we were able to control both Type I and Type II errors at  
417 reasonable levels. In addition, there did not seem to be strong interactions among the components  
418 – the error rates remained consistently low even when two or three components were changed  
419 simultaneously.

#### 420 **An empirical example**

421 In this section, we illustrate the potential of our method with an empirical example,  
422 previously analyzed by Powell et al. (2013). Invasion of an exotic shrub, *Lonicera maackii*, has  
423 caused significant, but strongly scale-dependent, decline in the diversity of understory plants in  
424 eastern Missouri (Powell et al. 2013). Specifically, Powell et al. (2013) showed that the effect  
425 size of the invasive plant on herbaceous plant species richness was large at relatively plot-level

426 spatial scales (1 m<sup>2</sup>), but the proportional effect declines with increasing windows of  
427 observations, with the effect becoming negligible at the largest spatial scale (500 m<sup>2</sup>). Using a  
428 null model approach, the authors further identified that the negative effect of invasion was  
429 mainly due to the decline in plant density observed in invaded plots. To recreate these analyses  
430 run the R code achieved here:  
431 [https://github.com/MoBiodiv/mobr/blob/master/scripts/methods\\_ms\\_figures.R](https://github.com/MoBiodiv/mobr/blob/master/scripts/methods_ms_figures.R).

432         The original study examined the effect of invasion at multiple scales using the slope and  
433 intercept of the species-area relationship. We now apply our MoB approach to data from one of  
434 their sites from Missouri, where the numbers of individuals of each species were recorded from  
435 50 1-m<sup>2</sup> plots sampled from within a 500-m<sup>2</sup> region in the invaded part of the forest, and another  
436 50 plots from within a 500-m<sup>2</sup> region in the uninvaded part of the forest. Our method leads to  
437 conclusions that are qualitatively similar to the original study, but with a richer analysis of the  
438 scale dependence. Moreover, our new methods show that invasion influenced both the SAD and  
439 spatial aggregation, in addition to density, and that these effects went in different directions and  
440 depended on spatial scale.

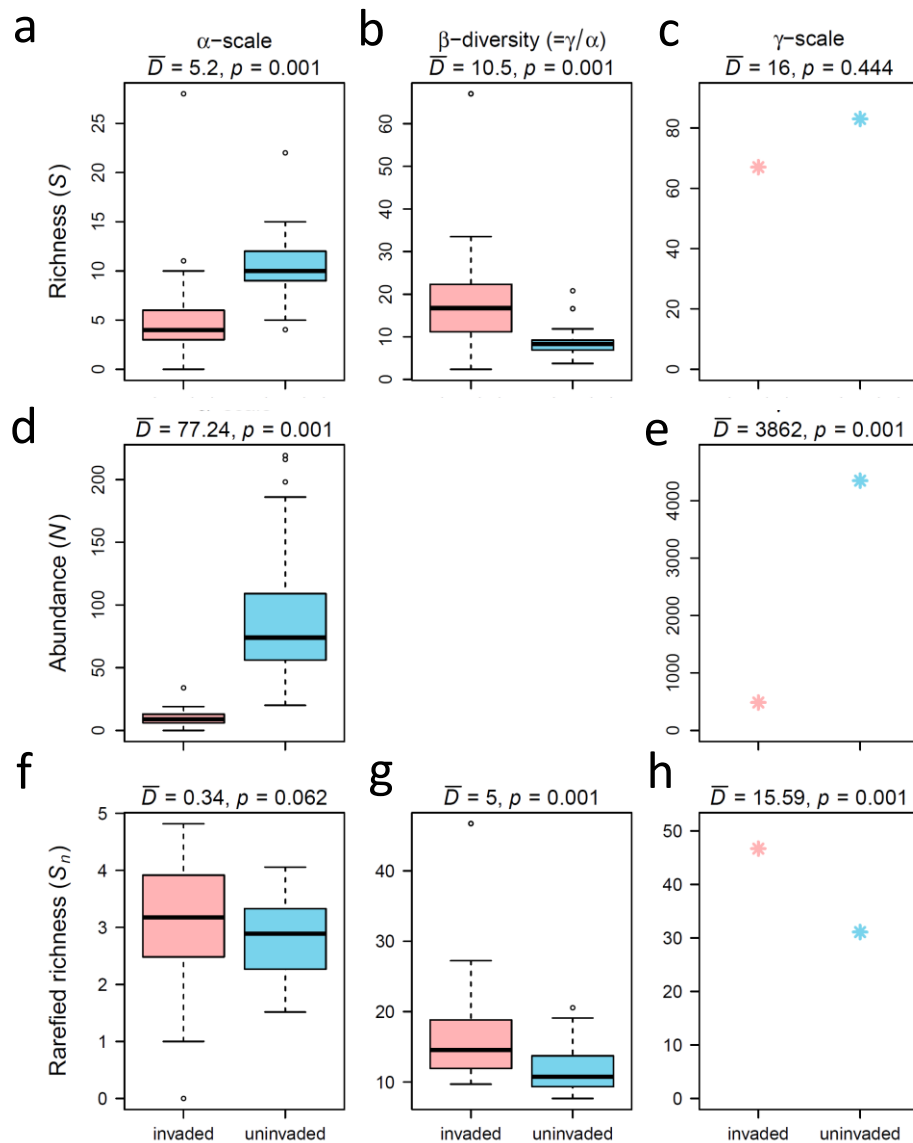

441

442 Figure 4. Simple two scale analysis output for case study. Biodiversity statistics for the invaded  
 443 (red boxplots and points) and uninvaded (blue boxplots and points) for vascular plant species  
 444 richness at the  $\alpha$  (i.e., single plot), beta (i.e., between plots), and  $\gamma$  (i.e., all plots) scales. The  $p$ -  
 445 values are based on 999 permutations of the treatment labels. Rarefied richness ( $S_n$ , panels f-h)  
 446 was computed for 5 and 250 individuals for the  $\alpha$  (f) and  $\gamma$  (h) scales respectively.

447 The two-scale analysis suggests that invasion decreases average richness ( $S$ ) at the  $\alpha$  (Fig.  
 448 4a,  $\bar{D} = 5.2, p = 0.001$ ) but not  $\gamma$  scale (Fig. 4c,  $\bar{D} = 16, p = 0.438$ ). Invasion also decreased total

449 abundance ( $N$ , Fig. 4d,e,  $p = 0.001$ ) which suggests that the decrease in  $S$  at the  $\alpha$  scale may be  
450 due to a decrease in individual abundance. Rarefied richness ( $S_n$ , Fig. 4f,h) allows us to test this  
451 hypothesis directly. Specifically, we found  $S_n$  was higher in the invaded areas (significantly so  $\bar{D}$   
452 = 15.59,  $p = 0.001$  at the  $\gamma$  scale defined here as  $n = 250$ ; Fig. 4h) which indicates that once the  
453 negative abundance effect was controlled for, invasion actually increased diversity through an  
454 increase in species evenness.

455 To identify whether the increase in evenness due to invasion was primarily because of  
456 shifts in common or rare species, we examined ENS of PIE ( $S_{\text{PIE}}$ ) and the undetected species  
457 richness ( $f_0$ ) (see Fig.5). At the  $\alpha$  scale, invasion did not strongly influence the SAD (Fig. 5a,d),  
458 but at the  $\gamma$  scale, there was evidence that invaded sites had greater evenness in the common  
459 species (Fig. 5f,  $\bar{D} = 5.78$ ,  $p = 0.001$ ). In other words, the degree of dominance by any one  
460 species was reduced.

461

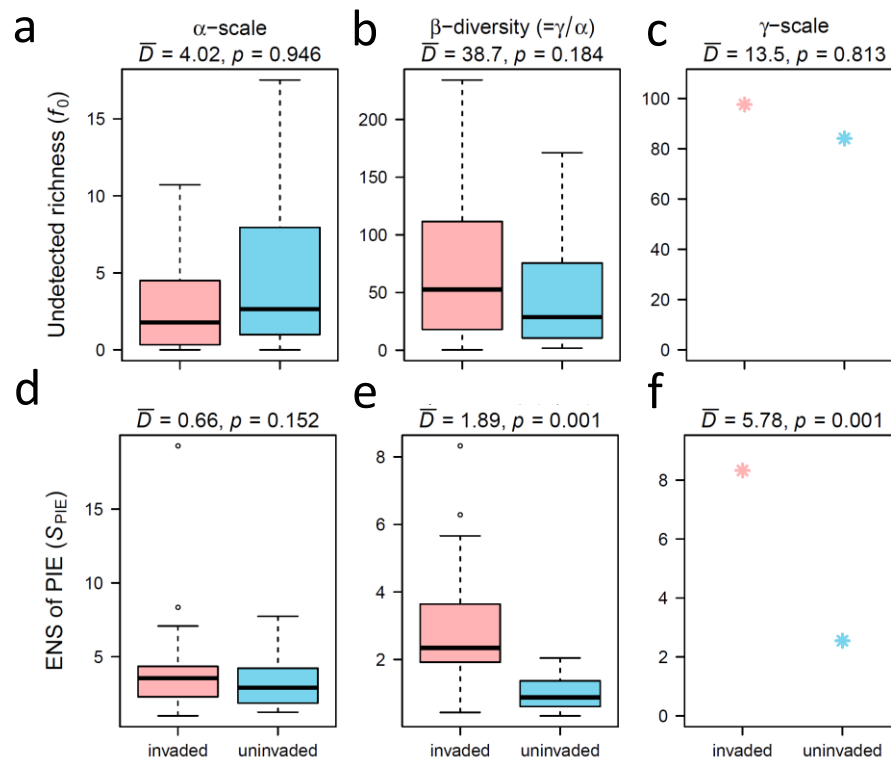

462

463 Figure 5. The two-scale analysis applied to metrics of biodiversity that emphasize changes in the  
 464 SAD. Colors as described in Fig. 4.  $f_0$  (a-c) is more sensitive to rare species, and  $S_{PIE}$  (d-f) is more  
 465 sensitive to common species. The  $p$ -values are based on 999 permutations of the treatment labels,  
 466 and outliers were removed from the  $f_0$  plot.

467 The  $\beta$  diversity metrics were significantly higher (Fig. 4b,g, Fig. 5e,  $p = 0.001$ ) in the  
 468 invaded sites (with the exception of  $\beta_{f_0}$ , Fig. 5b), suggesting that uninvaded sites had lower  
 469 spatial species turnover and thus were more homogenous. It did not appear that changes in  $N$   
 470 were solely responsible for the changes in beta-diversity because  $\beta_{S_n}$  displayed a very similar, but  
 471 slightly weaker, pattern as raw  $\beta_S$  (Fig. 4b,g).

472 Overall the two-scale analysis indicates: 1) that there are scale-dependent shifts in  
 473 richness, 2) that these are caused by invasion decreasing  $N$ , and increasing evenness in common  
 474 species, and increasing species patchiness.

475           Applying the continuous scale analysis, we further disentangled the effect of invasion on  
476 diversity through the three components (SAD, density, and aggregation) across all scales of  
477 interest. The results are shown in Fig. 6 which parallels the panels of the conceptual Fig. 3. Fig.  
478 6a-c present the three sets of curves for the two treatments: the plot-based accumulation curve, in  
479 which plots accumulate by their spatial proximity (Fig. 6a); the (non-spatial) plot-based  
480 rarefaction curve, in which individuals are randomized across plots within a treatment (Fig. 6b);  
481 and the individual-based rarefaction curve, in which species richness is plotted against number of  
482 individuals (Fig. 6c). Fig. 6d-f show the effect of invasion on richness, obtained by subtracting  
483 the red curve from the blue curve for each pair of curves (which correspond to the curves of the  
484 same color in Fig. 3). The bottom panel, which shows the effect of invasion on richness through  
485 each of the three factors, is obtained by subtracting the curves in the middle panel from each  
486 other. The contribution of each component to difference in richness between the invaded and  
487 uninvaded sites is further illustrated in Fig. 6.  
488

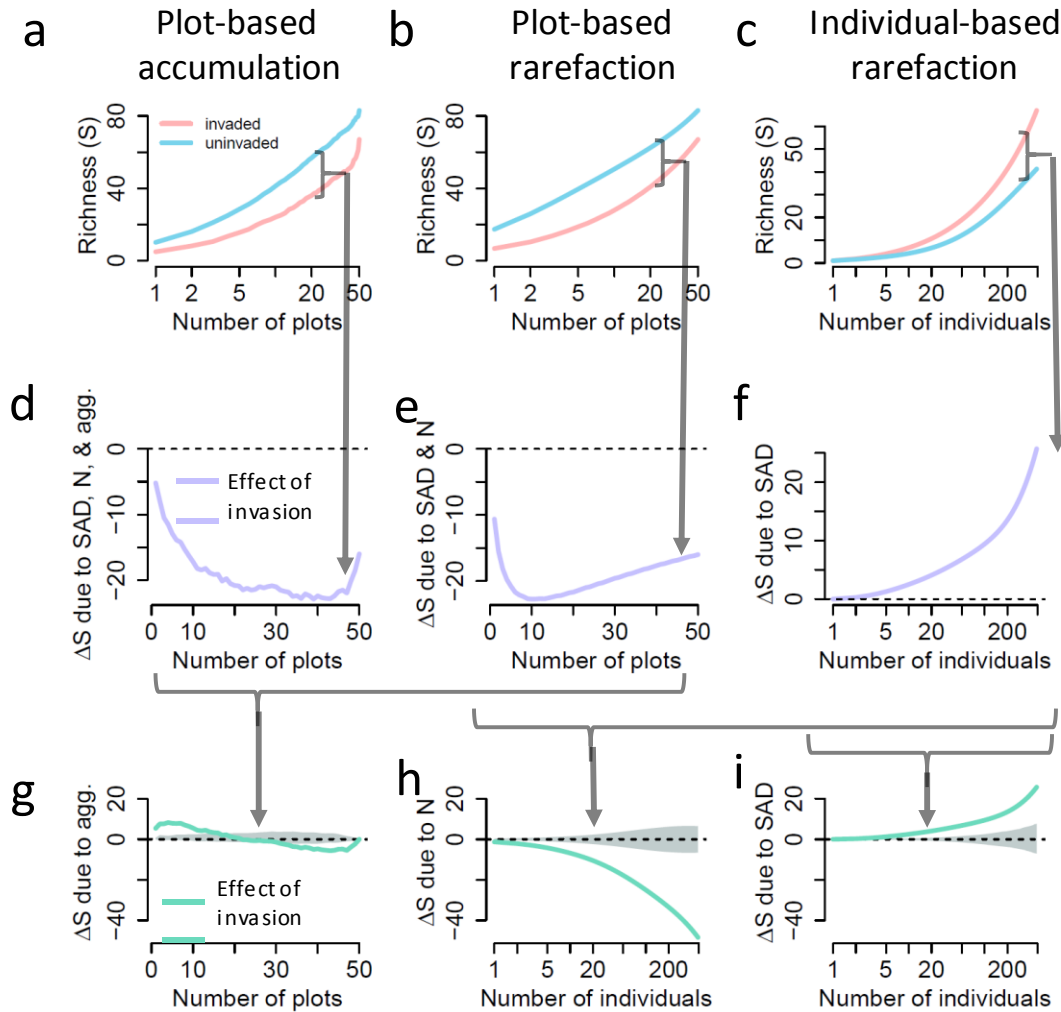

489

490 Figure 6. Applying the MoB continuous scale analysis on the invasion data set. The colors are as  
 491 in Fig. 3. Panel a, shows the invaded (red) and uninvaded (blue) accumulation and rarefaction. In  
 492 panel b, the purple curves show the difference in richness (uninvaded – invaded) for each set of  
 493 curves. In panel c, the green curves show the treatment effect on richness through each of the  
 494 three components, while the grey shaded area shows the 95% acceptance interval for the null  
 495 model, the cross scale DCLF test for each factor was significant ( $p = 0.001$ ). The dashed line  
 496 shows the point of no-change in richness between the treatments.

497 Consistent with the original study, our approach shows that the invaded site had lower  
 498 richness than the uninvaded site at all scales (Fig. 6a). Separating the effect of invasion into the

499 three components, we find that invasion actually had a positive effect on species richness  
500 through its impact on the shape of the SAD (Fig. 6i, Fig. 7a), which contributed to approximately  
501 20% of the observed change in richness (Fig. 7b). This counterintuitive result suggests that  
502 invasion has made the local community more even, meaning that the dominant species were  
503 most significantly influenced by the invader. However, this positive effect was completely  
504 overshadowed by the negative effect on species richness through reductions in the density of  
505 individuals (Fig. 6h, Fig. 7a), which makes a much larger contribution to the effect of invasion  
506 on richness (as large as 80%, Fig. 7b). Thus, the most detrimental effect of invasion was the  
507 sharp decline in the number of individuals. The effect of aggregation (Fig. 6g), is much smaller  
508 compared with the other two components and was most important at small spatial scales. Our  
509 approach thus validates the findings in the original study, but provides a more comprehensive  
510 way to quantify the contribution to richness decline caused by invasion by each of the three  
511 components, at every spatial scale.

512



513

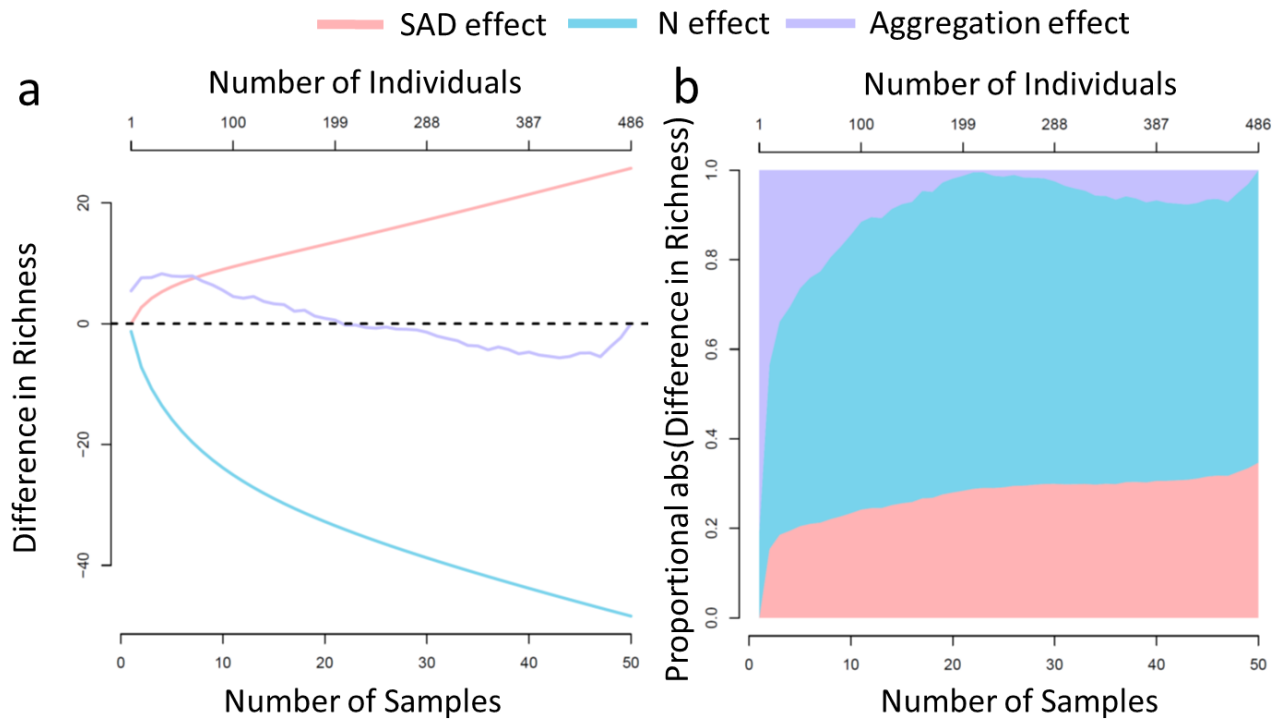

514

515 Figure 7. The effect of invasion on richness via individual effects on three components of  
516 community structure: SAD in red, density in blue, aggregation in purple across scales. The raw  
517 differences (a) and proportional stacked absolute values (b). The x-axis represents sampling  
518 effort in both numbers of samples (i.e., plots) and individuals (see top axis). The rescaling  
519 between numbers of individuals and plots we carried out by defining the maximum number of  
520 individuals rarefied to (486 individuals) as equivalent to the maximum number of plots rarefied  
521 to (50 plots), other methods of rescaling are possible. In panel (a) the dashed black line indicates  
522 no change in richness.

## 523 Discussion

524 How does species richness differ between experimental conditions or among sites that  
525 differ in key parameters in an observational study? This fundamental question in ecology often  
526 lacks a simple answer, because the magnitude (and sometimes even the direction) of change in

527 richness may vary with spatial scale (Chase et al. submitted, Chalcraft et al. 2004, Fridley et al.  
528 2004, Knight and Reich 2005, Palmer et al. 2008, Chase and Knight 2013, Powell et al. 2013,  
529 Blowes et al. 2017). Species richness is proximally determined by three underlying  
530 components—N, SAD and aggregation—which are also scale-dependent (Powell, Chase &  
531 Knight 2013, McGill 2011); this obscures the interpretation of the link between change in  
532 condition and change in species richness.

533         The MoB framework provides a comprehensive answer to this question by taking a  
534 spatially explicit approach and decomposing the effect of the condition (treatment) on richness  
535 into its individual components. The two-scale analysis provides a big-picture understanding of  
536 the differences and proximate drivers of richness by only examining the single plot ( $\alpha$ ) and all  
537 plots combined ( $\gamma$ ) scales. The continuous scale analysis expands the endeavor to cover a  
538 continuum of scales, and quantitatively decomposes change in richness into three components:  
539 change in the shape of the SAD, change in individual density, and change in spatial aggregation.  
540 As such, we can not only quantify how richness changes at any scale of interest, but also identify  
541 how the change occurs and consequently push the ecological question to a more mechanistic  
542 level. For example, we can ask to what extent the effects on species richness are driven by  
543 numbers of individuals. Or instead, whether common and rare species, or their spatial  
544 distributions, are more strongly influenced by the treatments.

545         Here we considered the scenario of comparing a discrete treatment effect on species  
546 richness, but clearly the MoB framework will need to be extended to other kinds of experimental  
547 designs and questions (fully described in Supplement S5). The highest priority extension of the  
548 framework is to generalize it from a comparison of discrete treatment variables to continuous  
549 drivers such as temperature and productivity. Additionally, we recognize that abundance is

550 difficult to collect for many organisms and that there is a need to understand if alternative  
551 measures of commonness (e.g., visual cover, biomass) can also be used to gain similar insights.  
552 Finally, we have only focused on taxonomic diversity here, whereas other types of  
553 biodiversity—most notably functional and phylogenetic diversity—are often of great interest,  
554 and comparisons such as those we have overviewed here would also be of great importance for  
555 these other biodiversity measures. Importantly, phylogenetic and functional diversity measures  
556 share many properties of taxonomic diversity that we have overviewed here (e.g., scale-  
557 dependence, non-linear accumulations, rarefactions, etc) (e.g., Chao et al. 2014), and it would  
558 seem quite useful to extend our framework to these sorts of diversities. We look forward to  
559 working with the community to develop extensions of the MoB framework that are most needed  
560 for understanding scale dependence in diversity change.

561         MoB is a novel and robust approach that explicitly addresses the issue of scale-  
562 dependence in studies of diversity, and quantitatively disentangles diversity change into its three  
563 components. Our method demonstrates how spatially explicit community data and carefully  
564 framed comparisons can be combined to yield new insight into the underlying components of  
565 biodiversity. We hope the MoB framework will help ecologists move beyond single-scale  
566 analyses of simple and relatively uninformative metrics such as species richness alone. We view  
567 this as a critical step in reconciling much confusion and debate over the direction and magnitude  
568 of diversity responses to natural and anthropogenic drivers. Ultimately accurate predictions of  
569 biodiversity change will require knowledge of the relevant drivers and the spatial scales over  
570 which they are most relevant, which MoB (and its future extensions), helps to uncover.

571

572 **Acknowledgments**

573 This paper emerged from several workshops funded with the support (to JMC) from the German  
574 Centre for Integrative Biodiversity Research (iDiv) Halle-Jena-Leipzig funded by the German  
575 Research Foundation (FZT 118) and by the Alexander von Humboldt Foundation as part of the  
576 Alexander von Humboldt Professorship of TMK. DJM was also supported by College of  
577 Charleston startup funding. We further thank N. Sanders, J. Belmaker, and D. Storch for  
578 discussions and comments on our approach.

579 **Data Accessibility**

580 The data is archived with the R package on GitHub: <https://github.com/mobiodiv/mobr>

581 **Literature Cited**

582 Baddeley, A., P. J. Diggle, A. Hardegen, T. Lawrence, R. K. Milne, and G. Nair. 2014. On tests  
583 of spatial pattern based on simulation envelopes. *Ecological Monographs* 84:477–489.

584 Blowes, S. A., J. Belmaker, and J. M. Chase. 2017. Global reef fish richness gradients emerge  
585 from divergent and scale-dependent component changes. *Proc. R. Soc. B* 284:20170947.

586 Cayuela, L., N. J. Gotelli, and R. K. Colwell. 2015. Ecological and biogeographic null  
587 hypotheses for comparing rarefaction curves. *Ecological Monographs* 85:437–455.

588 Chalcraft, D. R., J. W. Williams, M. D. Smith, and M. R. Willig. 2004. Scale dependence in the  
589 species-richness-productivity relationship: The role of species turnover. *Ecology*  
590 85:2701–2708.

591 Chao, A. 1984. Nonparametric Estimation of the Number of Classes in a Population.  
592 *Scandinavian Journal of Statistics* 11:265–270.

- 593 Chao, A., C. H. Chiu, and L. Jost. 2014. Unifying species diversity, phylogenetic diversity,  
594 functional diversity, and related similarity and differentiation measures through Hill  
595 numbers. *Annual Review of Ecology, Evolution, and Systematics* 45:297–324.
- 596 Chase, J. M., and T. M. Knight. 2013. Scale-dependent effect sizes of ecological drivers on  
597 biodiversity: why standardised sampling is not enough. *Ecology Letters* 16:17–26.
- 598 Chase, J. M., and M. A. Leibold. 2002. Spatial scale dictates the productivity-biodiversity  
599 relationship. *Nature* 416:427–430.
- 600 Chase, J. M., B. J. McGill, D. J. McGlinn, F. May, S. A. Blowes, X. Xiao, T. M. Knight, O.  
601 Purschke, and N. J. Gotelli. submitted. A scale-explicit guide for comparing biodiversity  
602 across communities.
- 603 Chiarucci, A., G. Bacaro, D. Rocchini, C. Ricotta, M. W. Palmer, and S. M. Scheiner. 2009.  
604 Spatially constrained rarefaction: incorporating the autocorrelated structure of biological  
605 communities into sample-based rarefaction. *Community Ecology* 10:209–214.
- 606 Collins, M. D., and D. Simberloff. 2009. Rarefaction and nonrandom spatial dispersion patterns.  
607 *Environmental and Ecological Statistics* 16:89–103.
- 608 Fridley, J. D., R. L. Brown, and J. E. Bruno. 2004. Null models of exotic invasion and scale-  
609 dependent patterns of native and exotic species richness. *Ecology* 85:3215–3222.
- 610 Gotelli, N. J., and R. K. Colwell. 2001. Quantifying biodiversity: procedures and pitfalls in the  
611 measurement and comparison of species richness. *Ecology Letters* 4:379–391.
- 612 Harte, J., T. Zillio, E. Conlisk, and A. B. Smith. 2008. Maximum entropy and the state-variable  
613 approach to macroecology. *Ecology* 89:2700–2711.
- 614 He, F. L., and P. Legendre. 2002. Species diversity patterns derived from species-area models.  
615 *Ecology* 83:1185–1198.

- 616 Hubbell, S. P. 2001. *The Unified Neutral Theory of Biodiversity and Biogeography*. Princeton  
617 University Press, Princeton, NJ, USA.
- 618 Hurlbert, A. H. 2004. Species-energy relationships and habitat complexity in bird communities.  
619 *Ecology Letters* 7:714–720.
- 620 Hurlbert, S. H. 1971. The nonconcept of species diversity: a critique and alternative parameters.  
621 *Ecology* 52:577–586.
- 622 Karlson, R. H., H. V. Cornell, and T. P. Hughes. 2007. Aggregation influences coral species  
623 richness at multiple spatial scales. *Ecology* 88:170–177.
- 624 Knight, K. S., and P. B. Reich. 2005. Opposite relationships between invasibility and native  
625 species richness at patch versus landscape scales. *Oikos* 109:81–88.
- 626 Legendre, P., and L. Legendre. 1998. *Numerical ecology*. 2nd English Edition. Elsevier, Boston,  
627 Mass., USA.
- 628 Leibold, M. A., and J. M. Chase. 2017. *Metacommunity ecology*. Princeton University Press,  
629 Princeton, NJ.
- 630 Loosmore, N. B., and E. D. Ford. 2006. Statistical Inference Using the G or K Point Pattern  
631 Spatial Statistics. *Ecology* 87:1925–1931.
- 632 May, F. 2017. *mobsim: Spatial Simulation and Scale-Dependent Analysis of Biodiversity*  
633 *Changes*.
- 634 May, F., K. Gerstner, D. J. McGlenn, X. Xiao, and J. M. Chase. preprint. *mobsim: An R package*  
635 *for the simulation and measurement of biodiversity across spatial scales | bioRxiv*.  
636 *bioRxiv* 209502.
- 637 McGill, B. J. 2010. Towards a unification of unified theories of biodiversity. *Ecology Letters*  
638 13:627–642.

- 639 McGill, B. J. 2011. Species abundance distributions. Pages 105–122 *Biological Diversity:*  
640 *Frontiers in Measurement and Assessment*, eds. A.E. Magurran and B.J. McGill.
- 641 McGlinn, D. J., and M. W. Palmer. 2009. Modeling the sampling effect in the species-time-area  
642 relationship. *Ecology* 90:836–846.
- 643 McGlinn, D. J., X. Xiao, J. Kitzes, and E. P. White. 2015. Exploring the spatially explicit  
644 predictions of the Maximum Entropy Theory of Ecology. *Global Ecology and*  
645 *Biogeography* 24:675–684.
- 646 Palmer, M. W., and E. van der Maarel. 1995. Variance in species richness, species association,  
647 and niche limitation. *Oikos* 73:203–213.
- 648 Palmer, M. W., D. J. McGlinn, and J. F. Fridley. 2008. Artifacts and artificions in biodiversity  
649 research. *Folia Geobotanica* 43:245–257.
- 650 Powell, K. I., J. M. Chase, and T. M. Knight. 2013. Invasive Plants Have Scale-Dependent  
651 Effects on Diversity by Altering Species-Area Relationships. *Science* 339:316–318.
- 652 Rosenzweig, M. L. 1995. *Species Diversity in Space and Time*. Cambridge University Press,  
653 Cambridge, UK.
- 654 Simberloff, D. 1972. Properties of the Rarefaction Diversity Measurement. *The American*  
655 *Naturalist* 106:414–418.
- 656 Supp, S. R., X. Xiao, S. K. M. Ernest, and E. P. White. 2012. An experimental test of the  
657 response of macroecological patterns to altered species interactions. *Ecology* 93:2505–  
658 2511.
- 659 Tilman, D. 1994. Competition and biodiversity in spatially structured habitats. *Ecology* 75:2–16.

- 660 Tjørve, E., W. E. Kunin, C. Polce, and K. M. C. Tjørve. 2008. Species-area relationship:  
661 separating the effects of species abundance and spatial distribution. *Journal of Ecology*  
662 96:1141–1151.
- 663 Vellend, M. 2016. *The Theory of Ecological Communities*. Princeton University Press,  
664 Princeton, NJ, USA.
- 665 Whittaker, R. H. 1960. Vegetation of the Siskiyou Mountains, Oregon and California. *Ecological*  
666 *Monographs* 30:279–338.
- 667
